# Supplementary material for: Association between Dietary and Supplemental Antioxidants Intake and Lung Cancer Risk: Evidence from a Cancer Screening Trial
Source: Antioxidants (Basel). 2023 Jan 31;12(2):338. doi: 10.3390/antiox12020338 (PMC9952418; doi:10.3390/antiox12020338)
Supplement: Supplementary file 1 [file antioxidants-12-00338-s001.zip › antioxidants-2159421-supplementary.pdf]

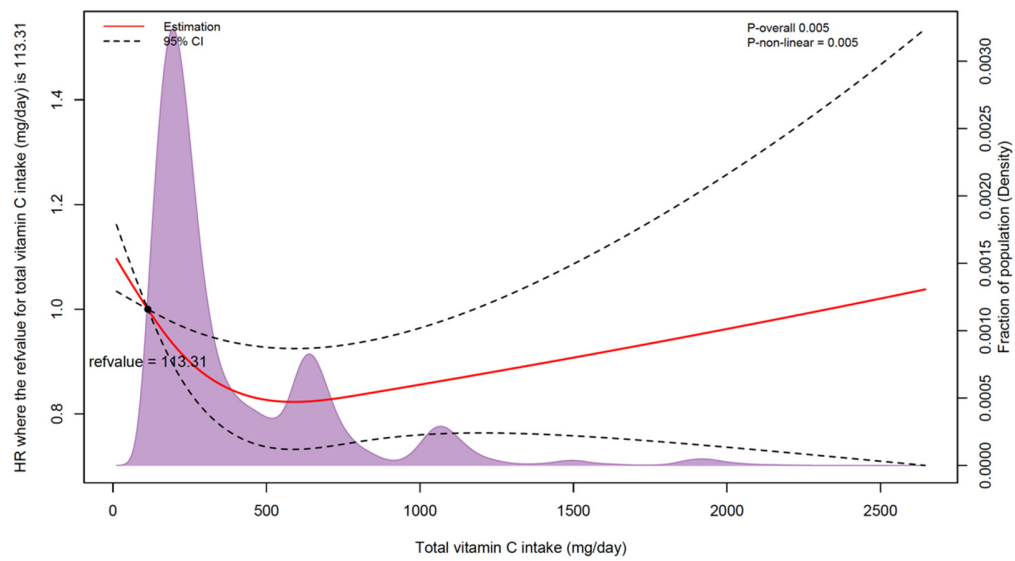

**Figure S1.** Dose-response curve for total vitamin C intake and lung cancer incidence

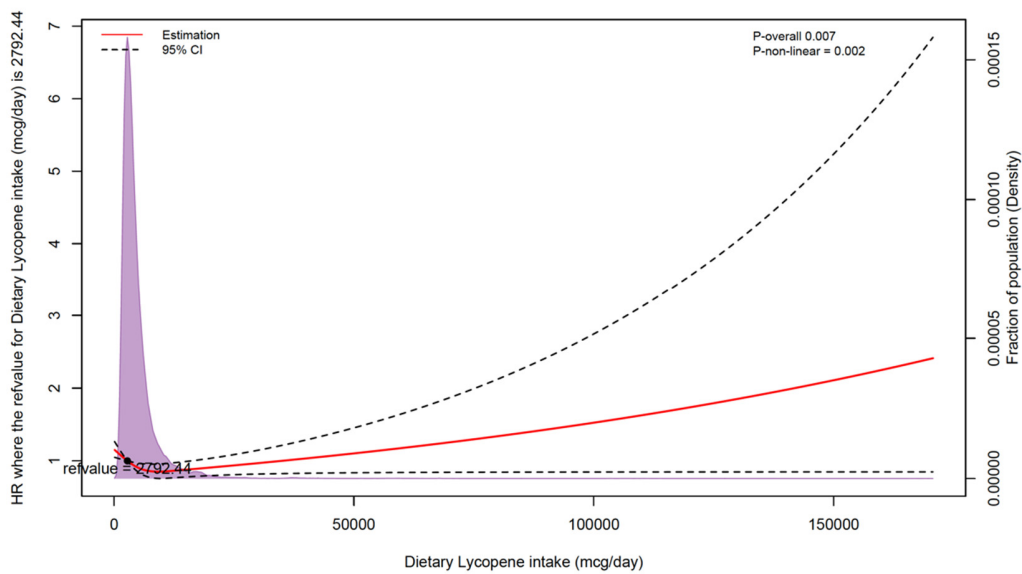

**Figure S2.** Dose-response curve for dietary lycopene intake and lung cancer incidence

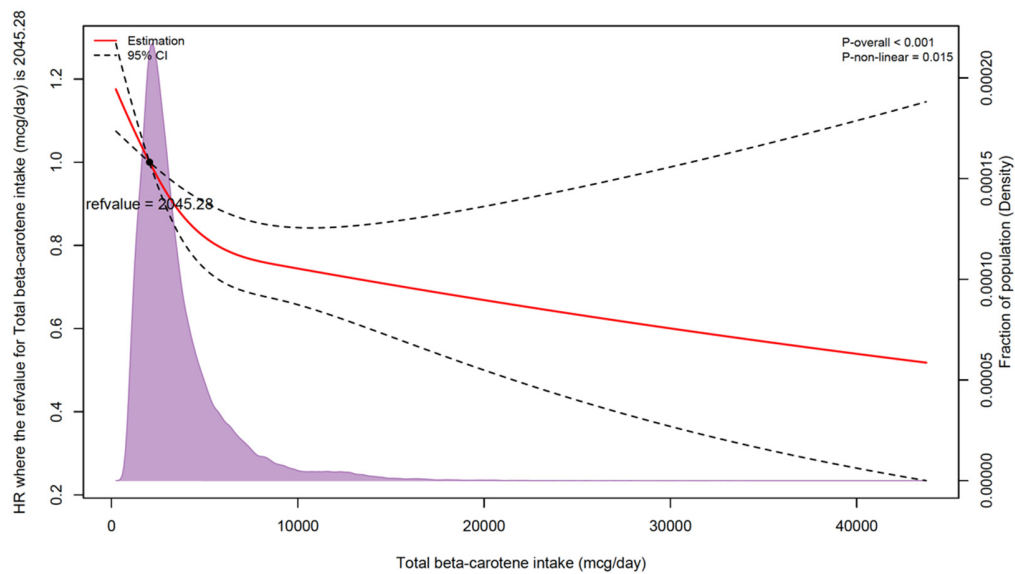

**Figure S3.** Dose-response curve for total  $\beta$ -carotene intake and lung cancer incidence

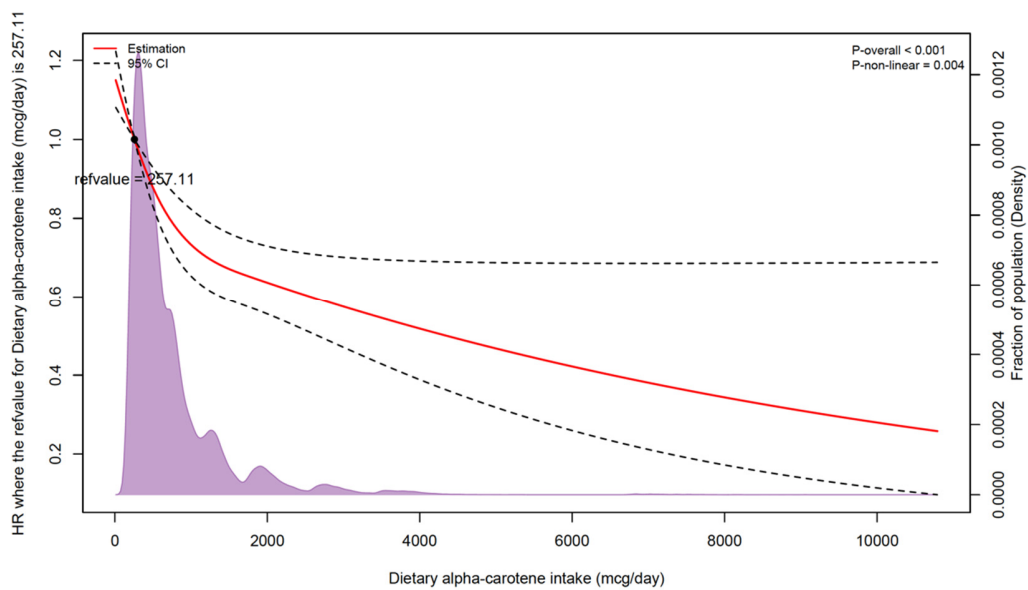

**Figure S4.** Dose-response curve for dietary  $\alpha$ -carotene intake and lung cancer incidence

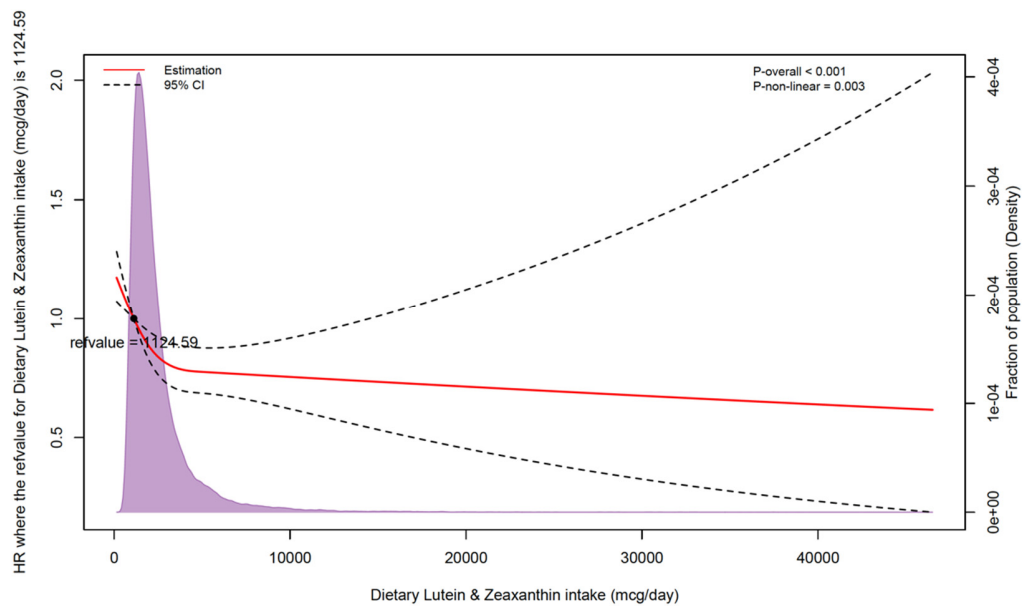

**Figure S5.** Dose-response curve for dietary lutein and zeaxanthin intake and lung cancer incidence

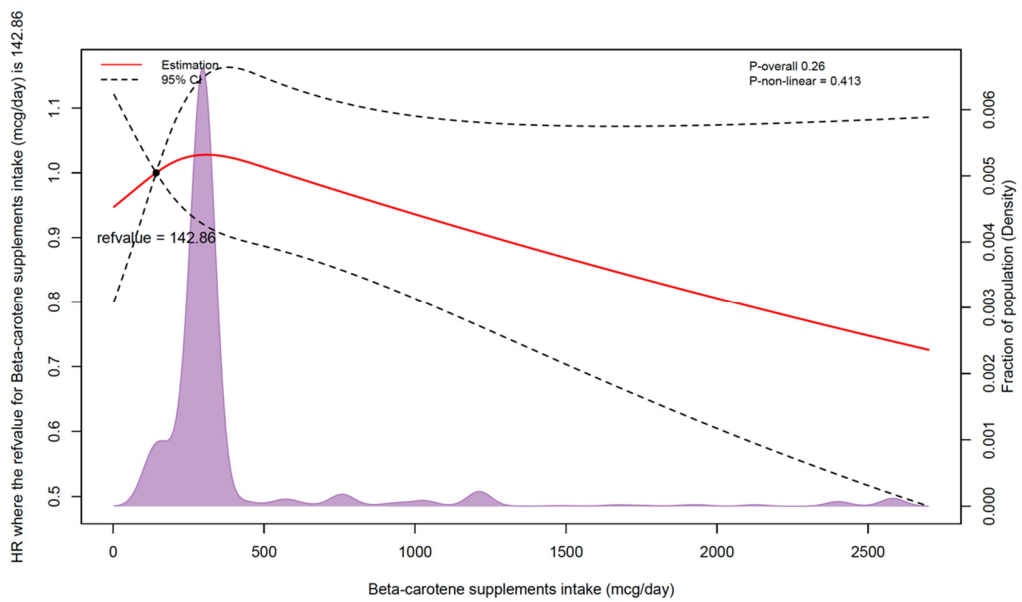

**Figure S6.** Dose-response curve for supplemental  $\beta$ -carotene intake and lung cancer incidence

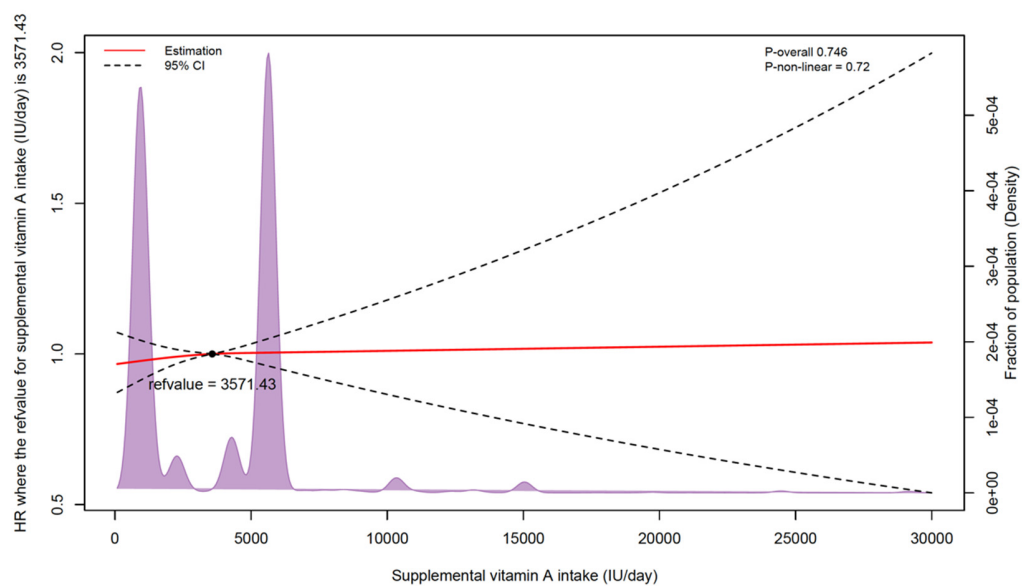

**Figure S7.** Dose-response curve for supplemental vitamin A intake and lung cancer incidence

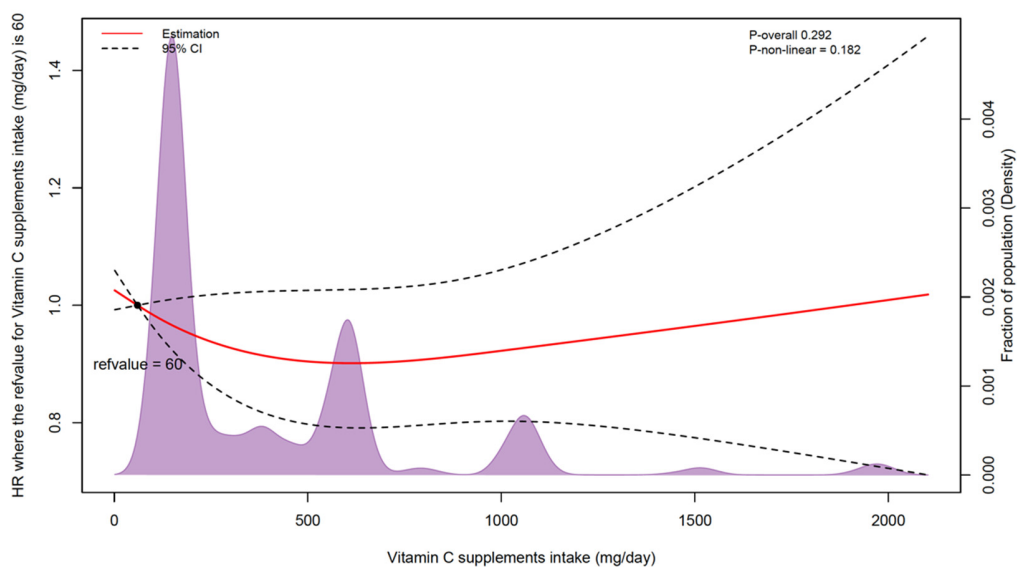

**Figure S8.** Dose-response curve for supplemental vitamin C intake and lung cancer incidence

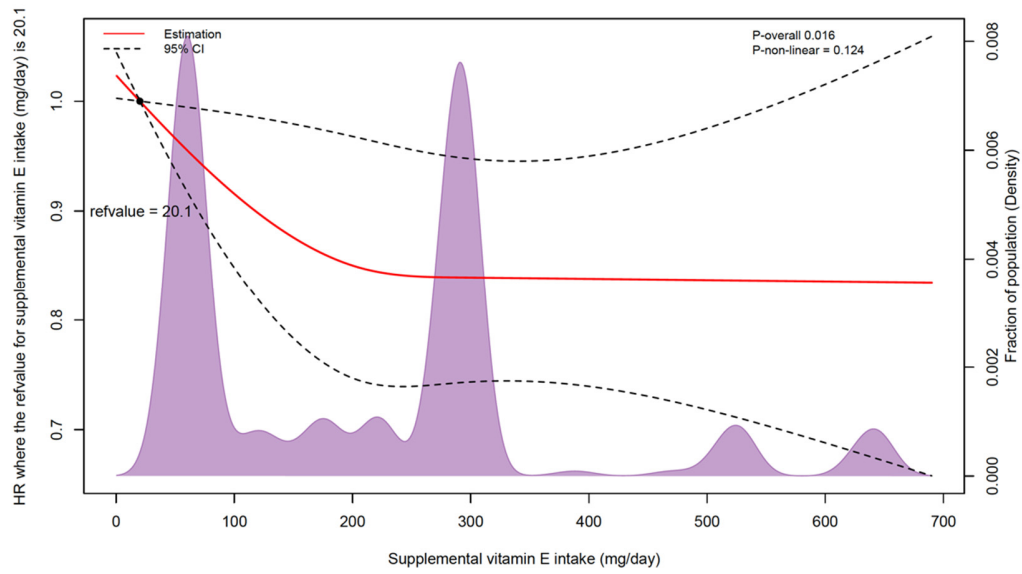

**Figure S9.** Dose-response curve for supplemental vitamin E intake and lung cancer incidence

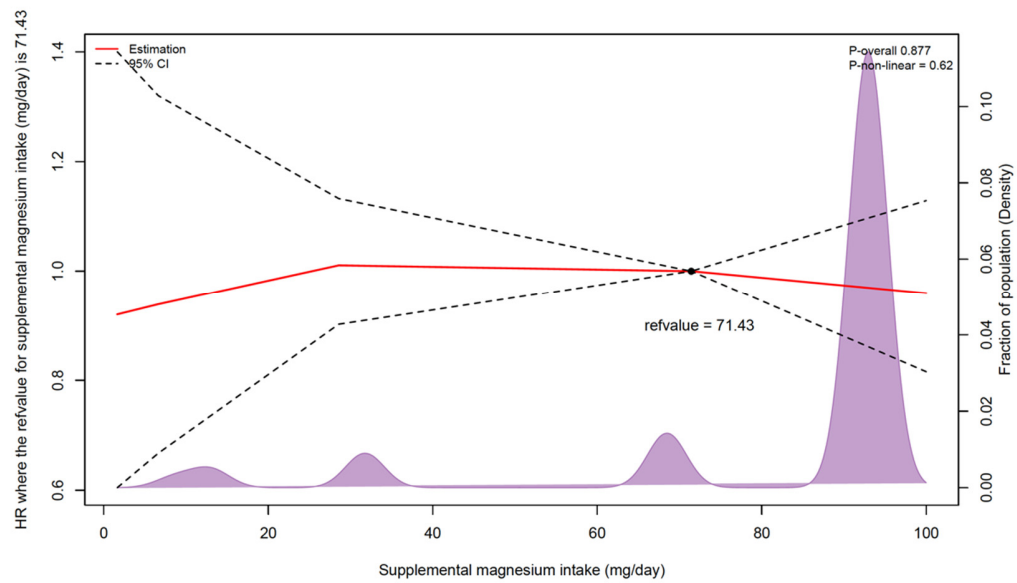

**Figure S10.** Dose-response curve for supplemental magnesium intake and lung cancer incidence

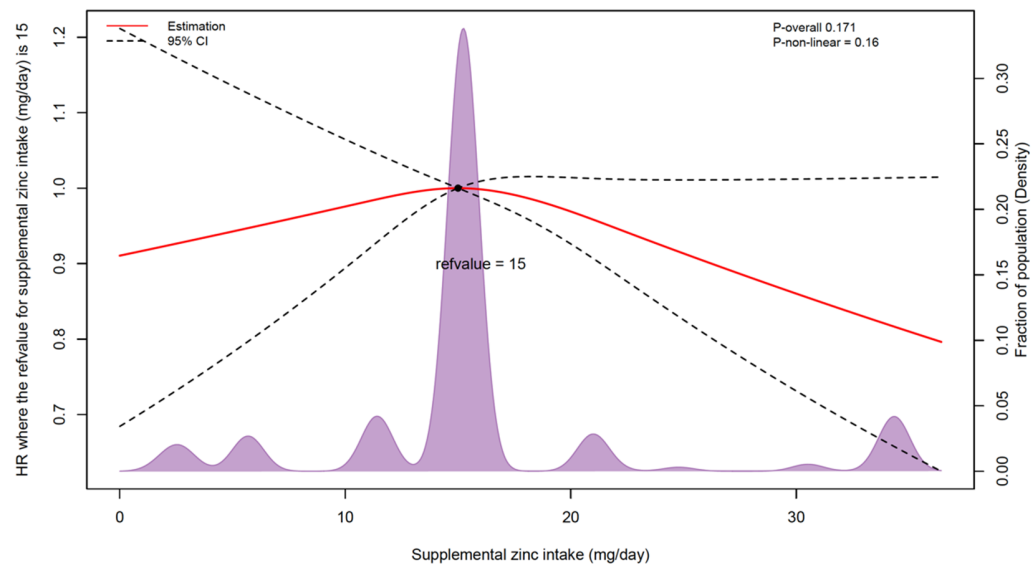

**Figure S11.** Dose-response curve for supplemental zinc intake and lung cancer incidence
